# Supplementary material for: Novel Chiral Ru(II) Complexes as Potential c-myc G-quadruplex DNA Stabilizers Inducing DNA Damage to Suppress Triple-Negative Breast Cancer Progression
Source: MDPI journal article supplement (doi:10.3390/ijms24010203), 2022-12-22
Supplement: s1 [file s1]

# **Supplementary Materials**

## **for**

### **Novel Chiral Ru(II) Complexes as Potential c-myc G-quadruplex DNA Stabilizers Inducing DNA Damage to Suppress Triple-Negative Breast Cancer Progression**

**Chanling Yuan <sup>1</sup>, Zhixiang Wang <sup>1</sup>, Zongtao Wang <sup>1</sup>, Wentao Liu <sup>1</sup>, Guohu Li <sup>1</sup>,  
Jinlan Meng <sup>2</sup>, Ruzhen Wu <sup>1</sup>, Qiong Wu <sup>3,4,\*</sup>, Jiacheng Wang <sup>1</sup> and Wenjie Mei <sup>1,4,\*</sup>**

<sup>1</sup> School of Pharmacy, Guangdong Pharmaceutical University, Guangzhou 510006, China

<sup>2</sup> Department of Physiology, School of Life Sciences and Biopharmaceutics, Guangdong Pharmaceutical University, Guangzhou 510006, China

<sup>3</sup> Institute of Biological and Medical Engineering, Guangdong Academy of Sciences, Guangzhou 530316, China

<sup>4</sup> Guangdong Engineering Technology Research Centre of Molecular Probe and Biomedicine Imaging, Guangdong Pharmaceutical University, Guangzhou 510006, China

\* Correspondence: wuqiongnu.1113@163.com (Q.W.); wenjiemei@gdpu.edu.cn (W.M.)

1801A9999-14 #31-46 RT: 0.05-0.08 AV: 8 NL: 1.60E7  
F: TMS + c ESI Full ms [100.0000-1000.0000]

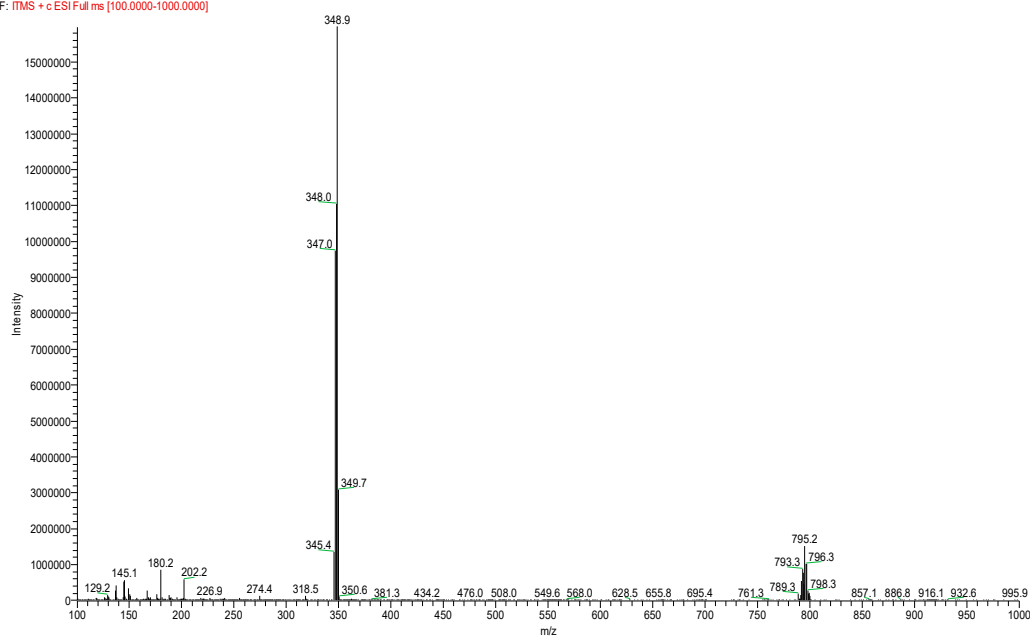

Figure S1. The ESI-MS spectra of  $\Delta$ -1.

TSQ Quantum Ultra

2018061-08 #10-13 RT: 0.09-0.11 AV: 2 SB: 2 0.00-0.05 0.12 NL: 4.63E7  
T: + c ESI QMG [100.000-1000.000]

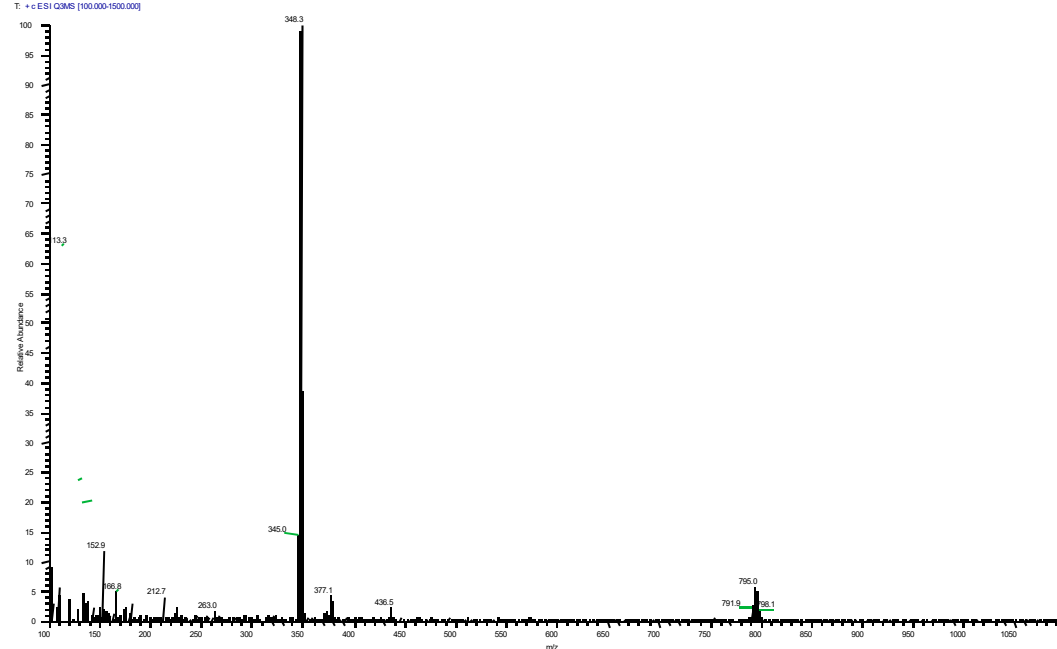

Figure S2. The ESI-MS spectra of  $\Delta$ -1.

20161211YJHM-09 #15 RT: 0.14 AV: 1 SB: 2 0.01-0.02 NL: 8.13E6  
T: + c ESI Q1MS [50.000-1500.000]

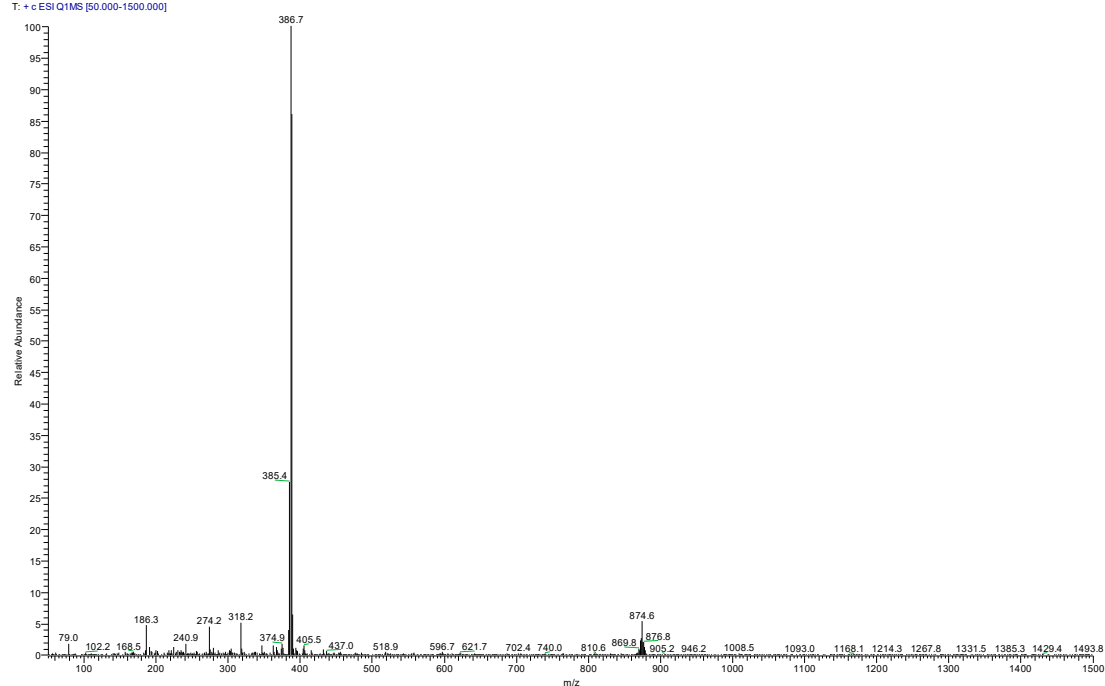

Figure S3. The ESI-MS spectra of  $\Delta$ -2.

1611B9004-04#11-13 RT: 0.10-0.12 AV: 2 NL: 7.68E6  
F: + c ESI Q3MS [50.000-1000.000]

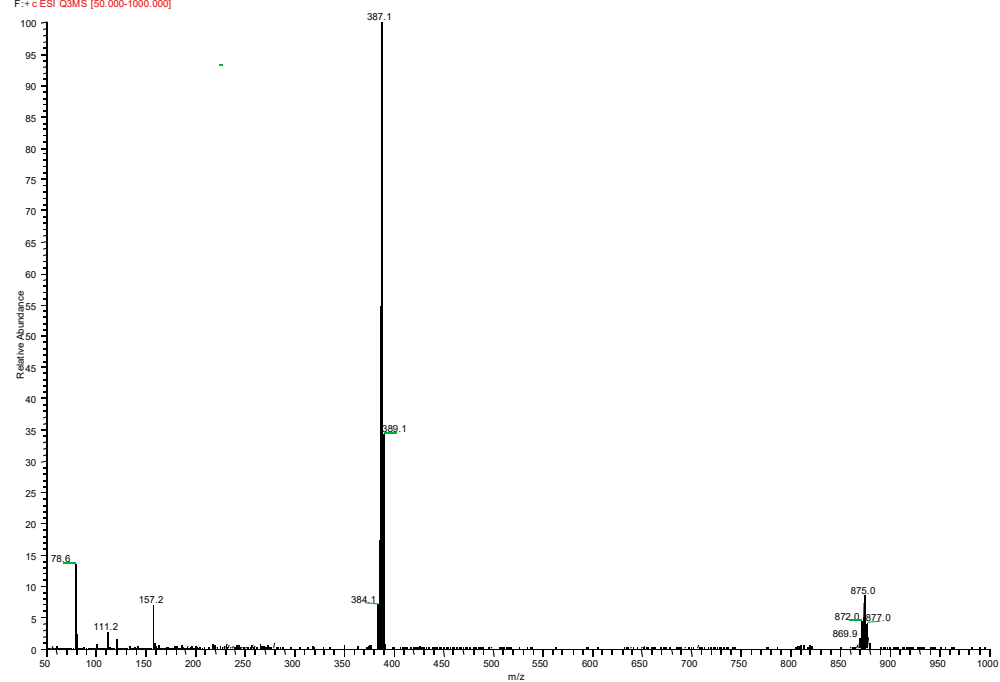

Figure S4. The ESI-MS spectra of  $\Delta$ -2.

1711c0989-05 #7 RT: 0.06 AV: 1 SB: 2 0.01-0.02, 0.32 NL: 3.94E6  
T: + c ESI Q3MS [100.000-1500.000]

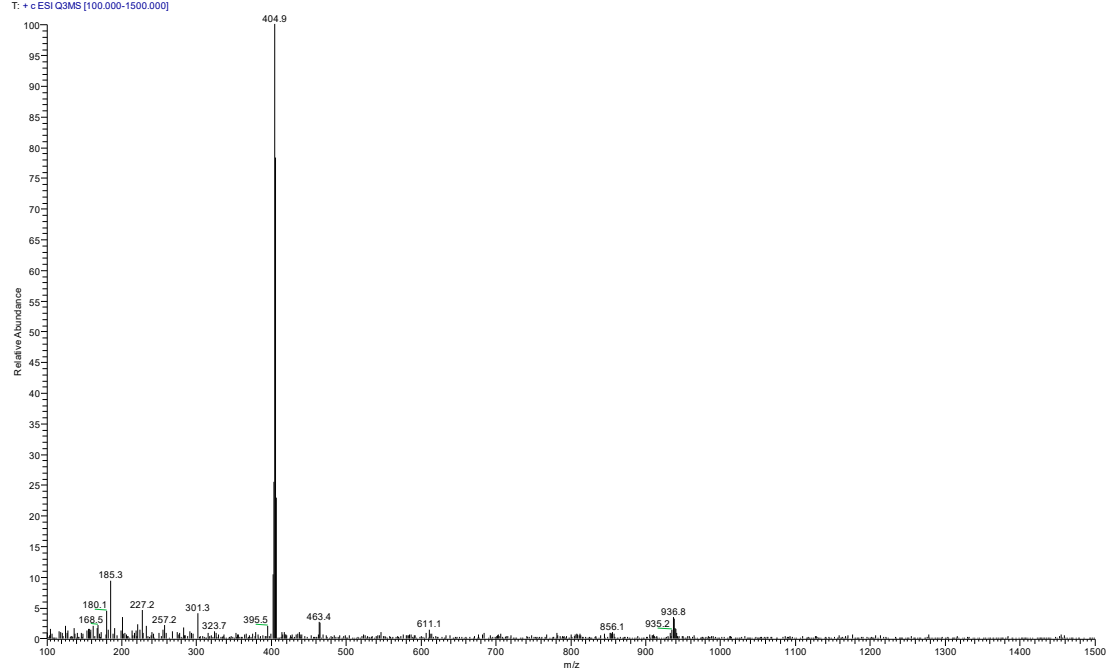

Figure S5. The ESI-MS spectra of  $\Delta$ -3.

1711D0182-03#16-24 RT: 0.07-0.09 AV: 4 SB: 3 0.01-0.03 NL: 4.35E6  
F: ITMS + c ESI Full ms [100.00-1500.00]

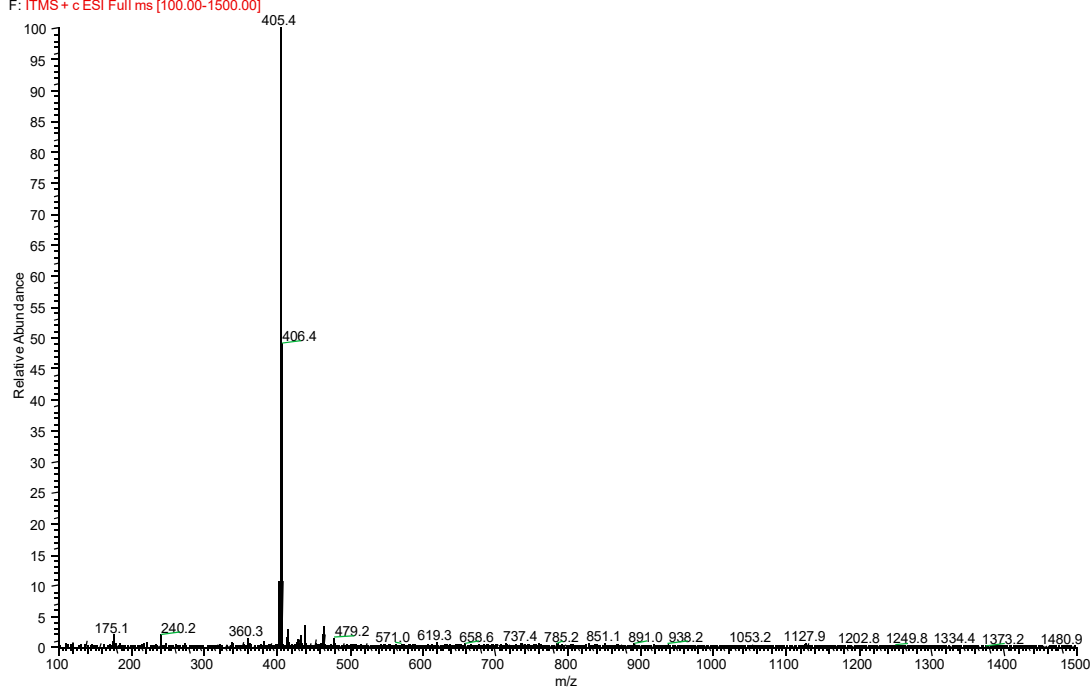

Figure S6. The ESI-MS spectra of  $\Delta$ -3.

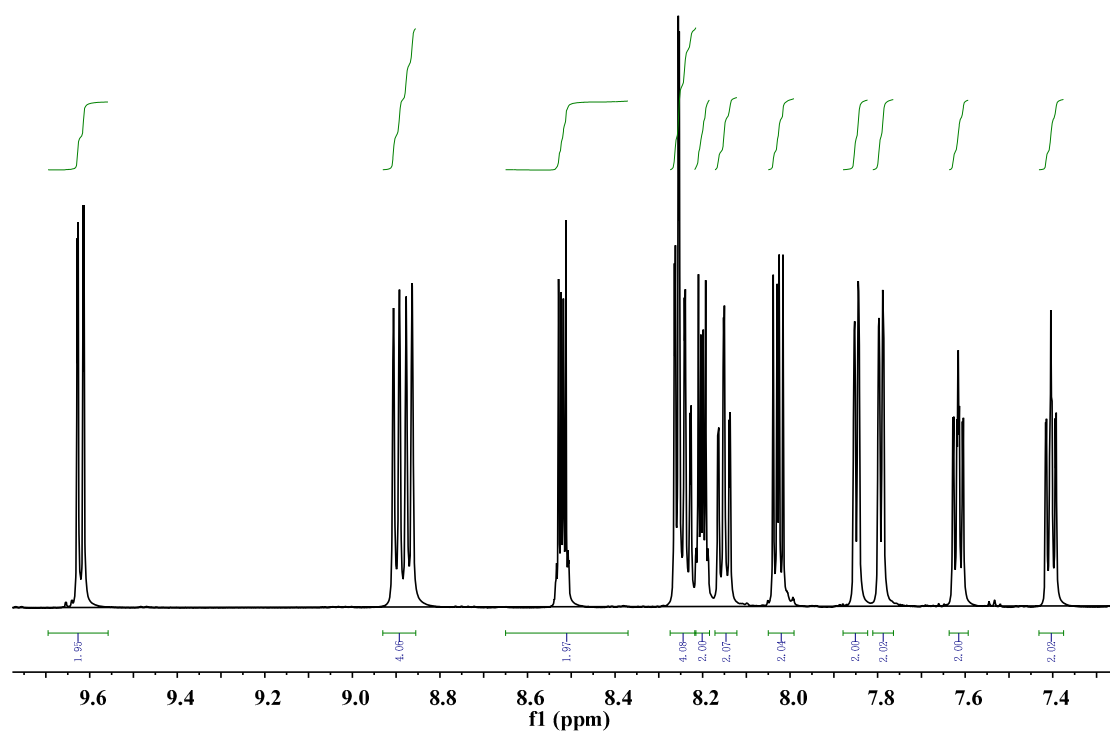

Figure S7. The  $^1\text{H}$  NMR spectra of  $\Delta$ -1.

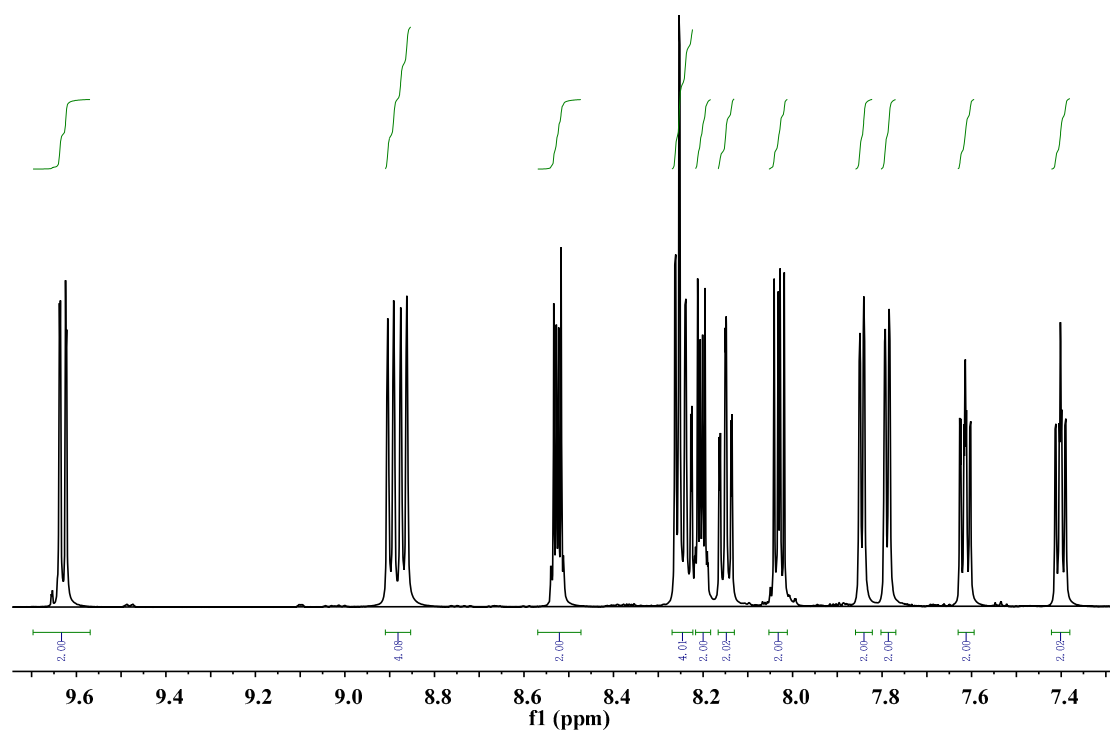

Figure S8. The  $^1\text{H}$  NMR spectra of  $\Delta$ -1.

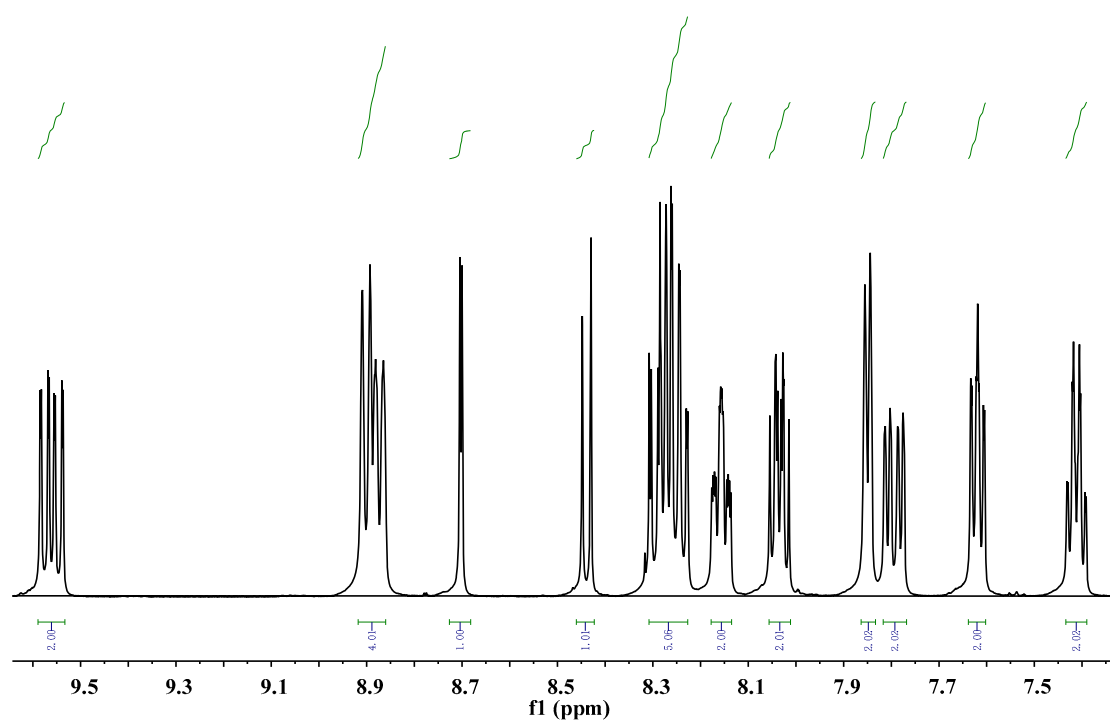

Figure S9. The  $^1\text{H}$  NMR spectra of  $\Delta$ -2.

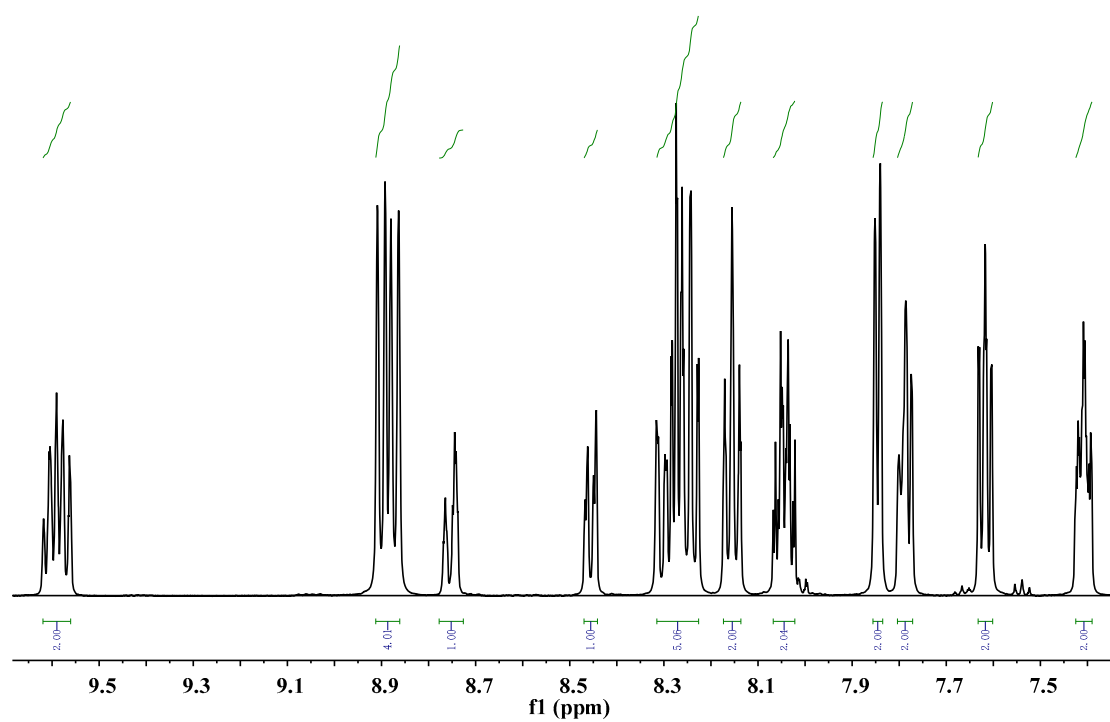

Figure S10. The  $^1\text{H}$  NMR spectra of  $\Delta$ -2.

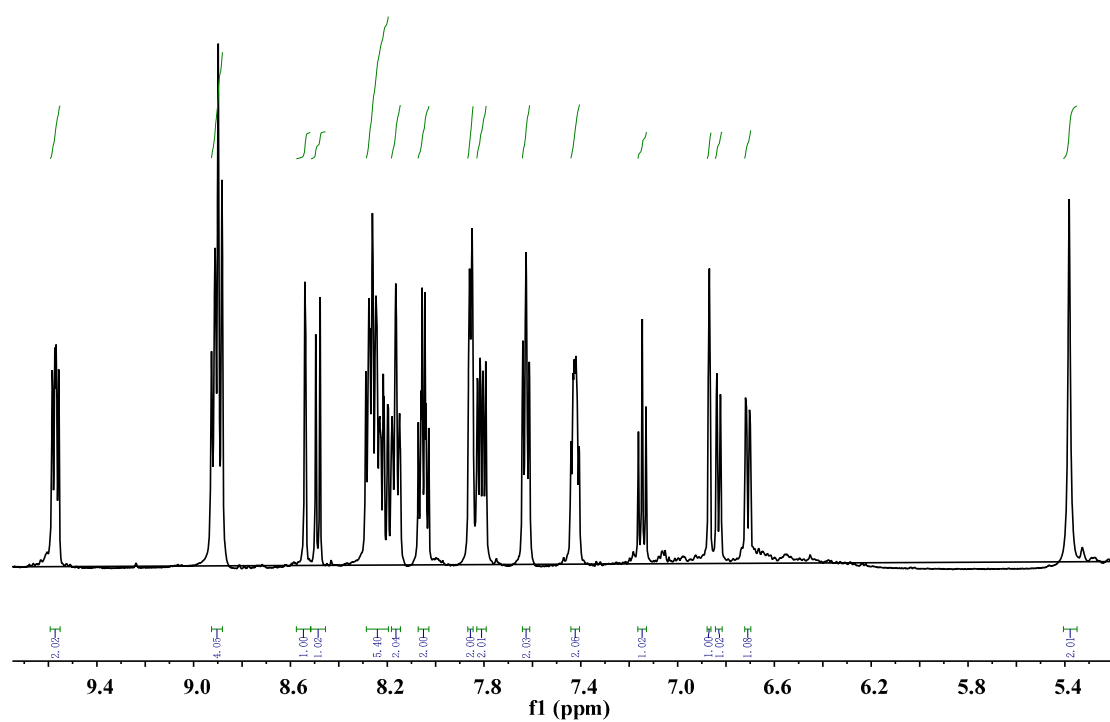

Figure S11. The  $^1\text{H}$  NMR spectra of  $\Delta$ -3.

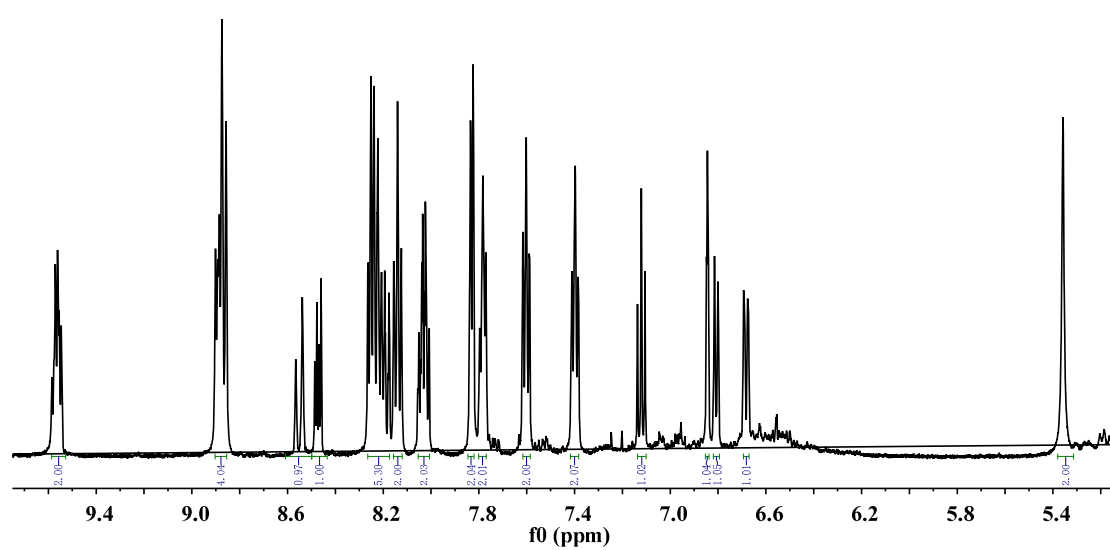

Figure S12. The  $^1\text{H}$  NMR spectra of  $\Delta$ -3.

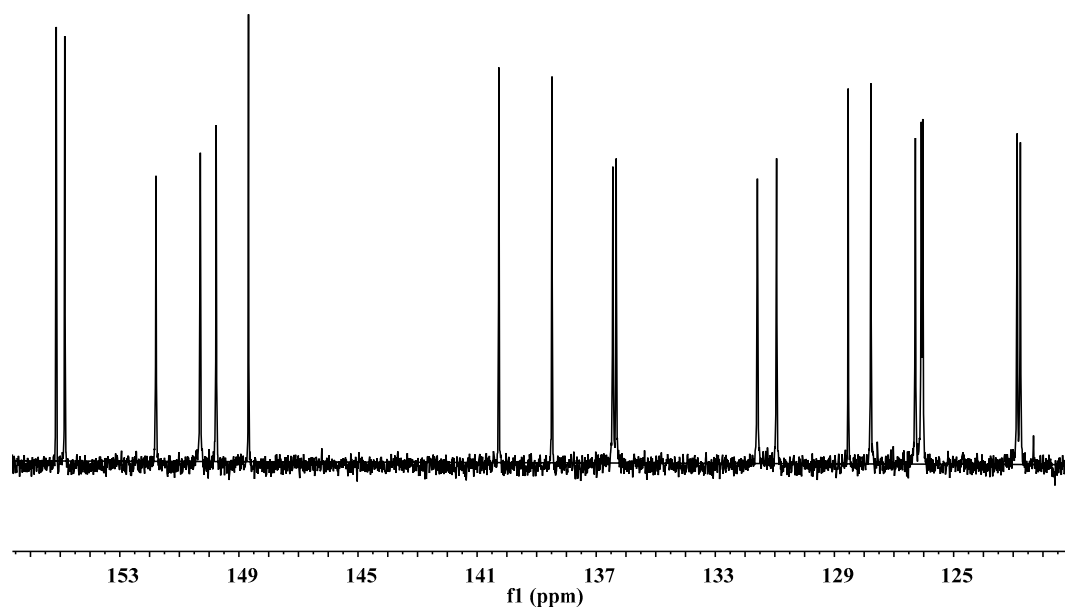

**Figure S13.** The  $^{13}\text{C}$  NMR spectra of  $\Delta$ -1.

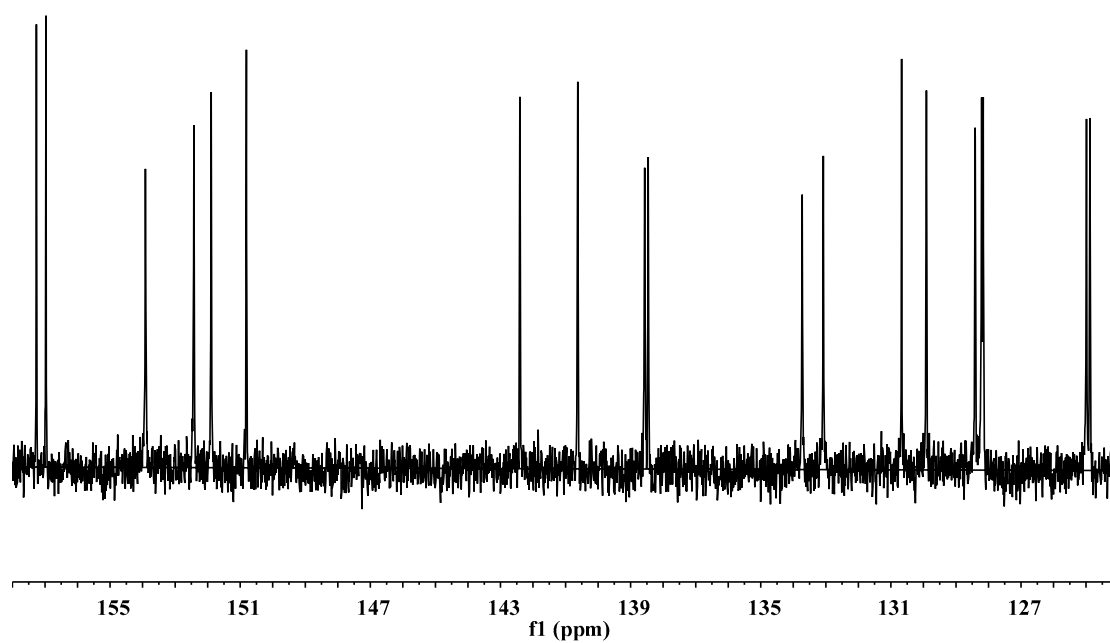

**Figure S14.** The  $^{13}\text{C}$  NMR spectra of  $\Delta$ -1.



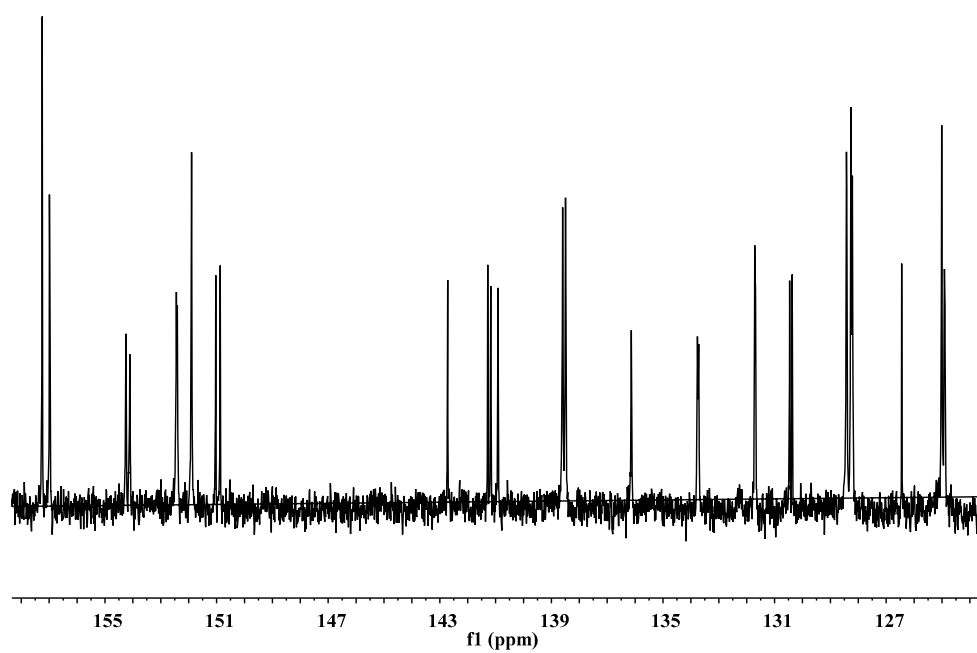

**Figure S15.** The  $^{13}\text{C}$  NMR spectra of  $\Delta$ -2.

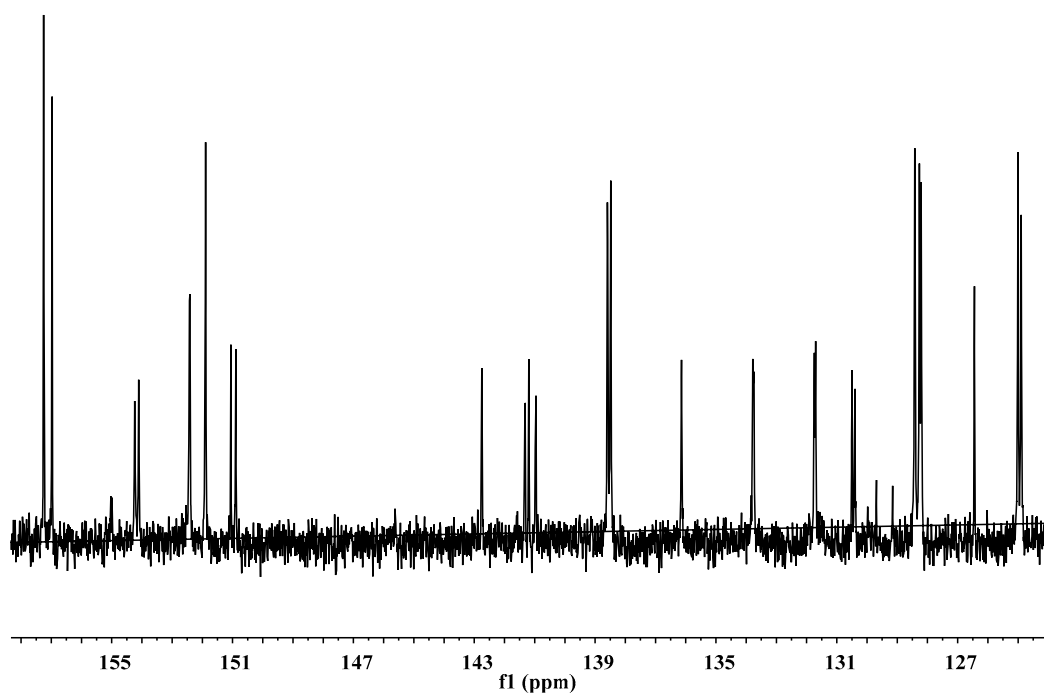

**Figure S16.** The  $^{13}\text{C}$  NMR spectra of  $\Delta$ -2.

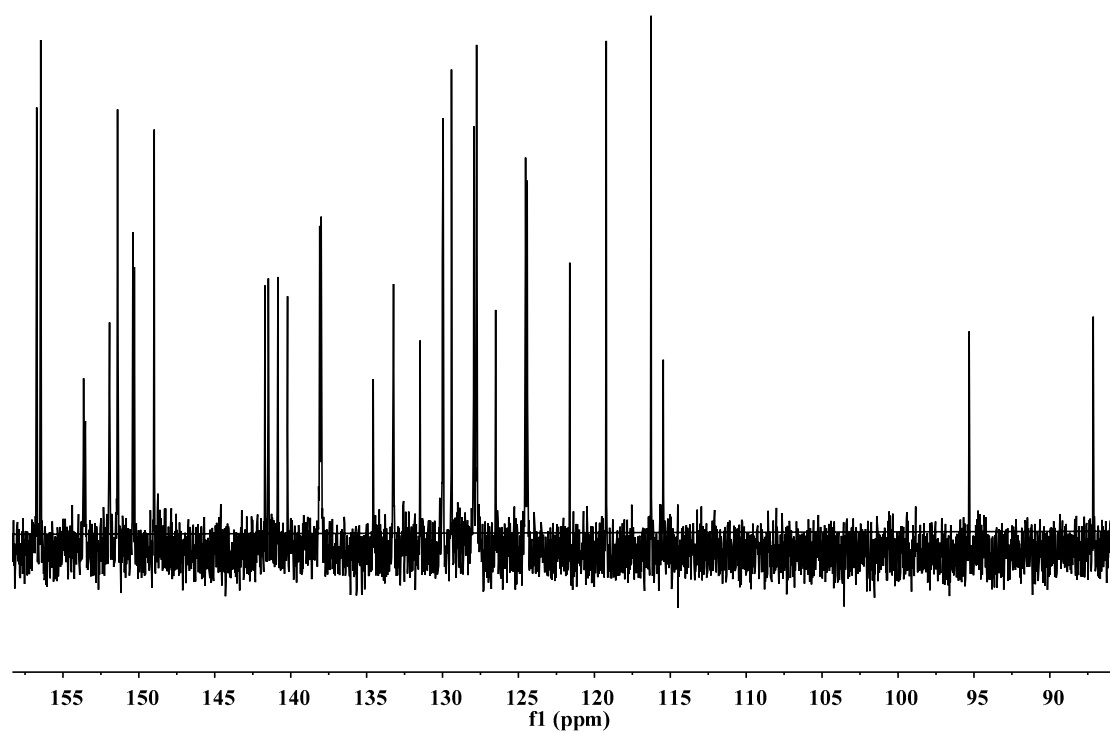

**Figure S17.** The  $^{13}\text{C}$  NMR spectra of  $\Delta\text{-3}$ .

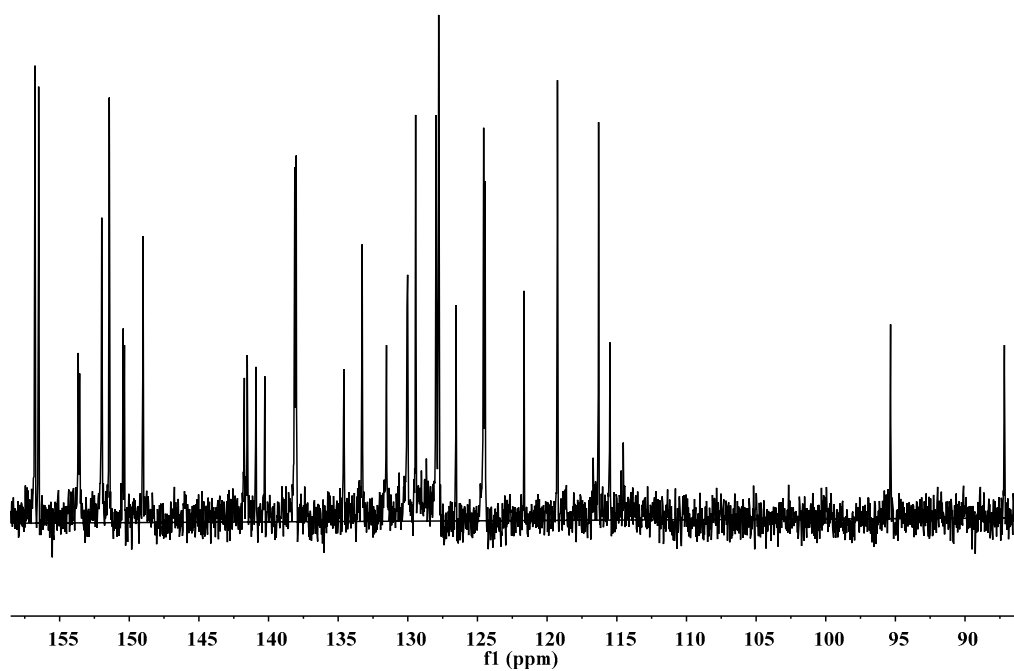

**Figure S18.** The  $^{13}\text{C}$  NMR spectra of  $\Delta\text{-3}$ .

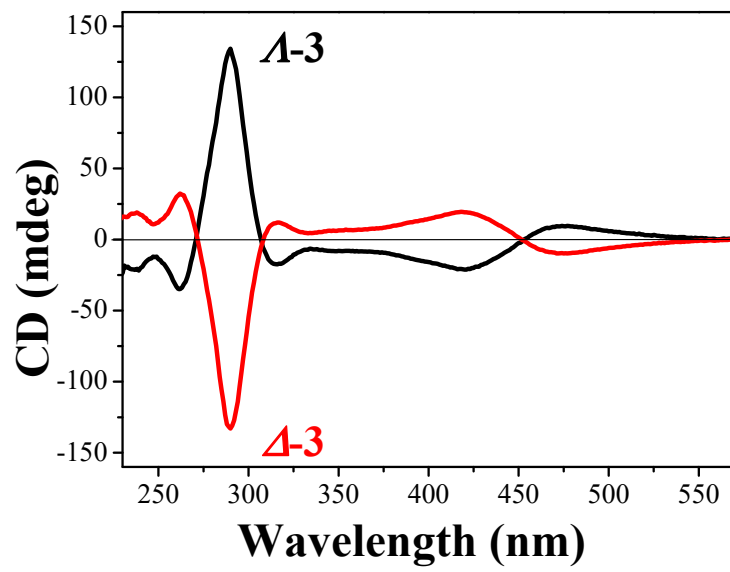

**Figure S19.** The CD spectra of  $\Lambda$ -3 and  $\Delta$ -3.

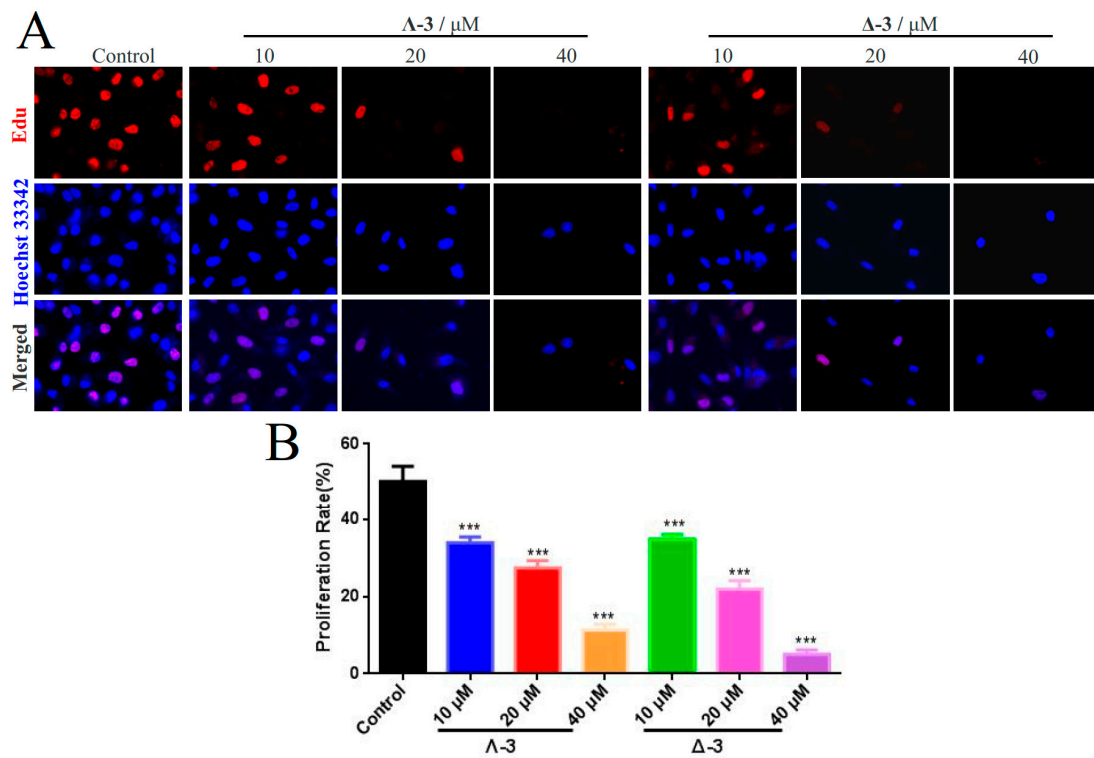

**Figure S20.** (A) EdU proliferation assay analysis and (B) proliferation rate of the effect of  $\Lambda$ -3 and  $\Delta$ -3 on the growth of MDA-MB-231 cells.

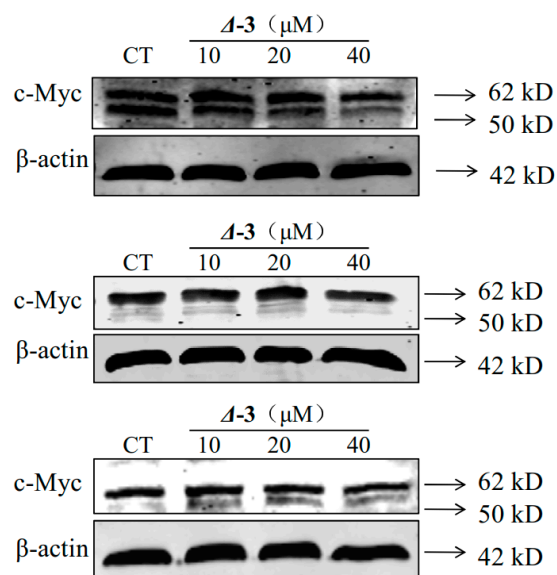

**Figure S21.** The expression of c-myc protein changed after dealt with  $\Delta$ -3 (0, 10, 20 and 40  $\mu$ M) in MDA-MB 231 cells for 72 h (three repeat measurement).

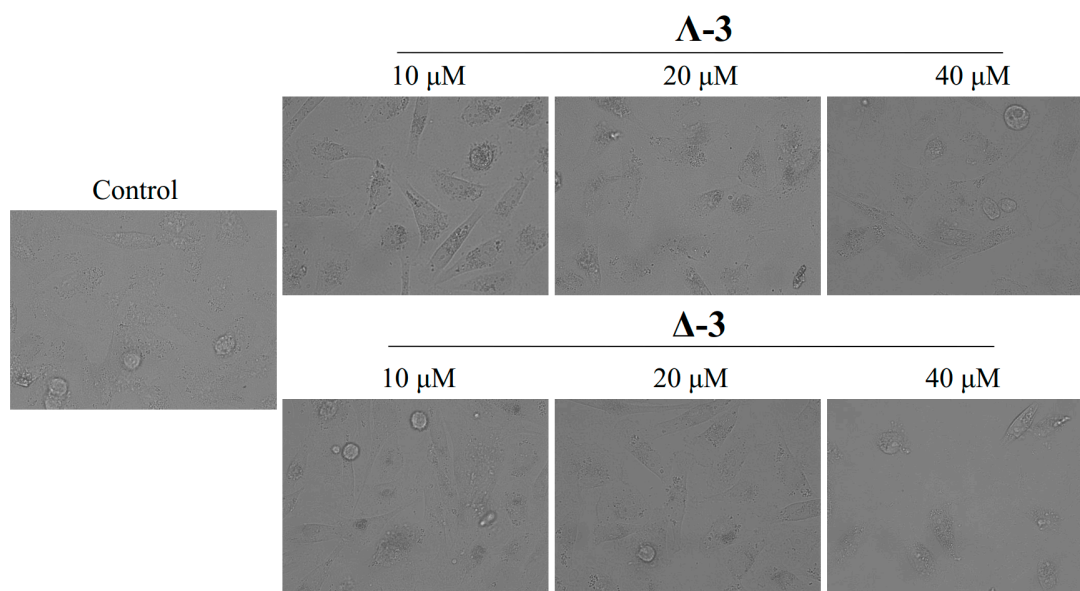

**Figure S22.** The morphological change of MDA-MB-231 cells in the absence and presence of  $\Delta$ -3 and  $\Delta$ -3 (0,10, 20 and 40  $\mu$ M) for 72 h.

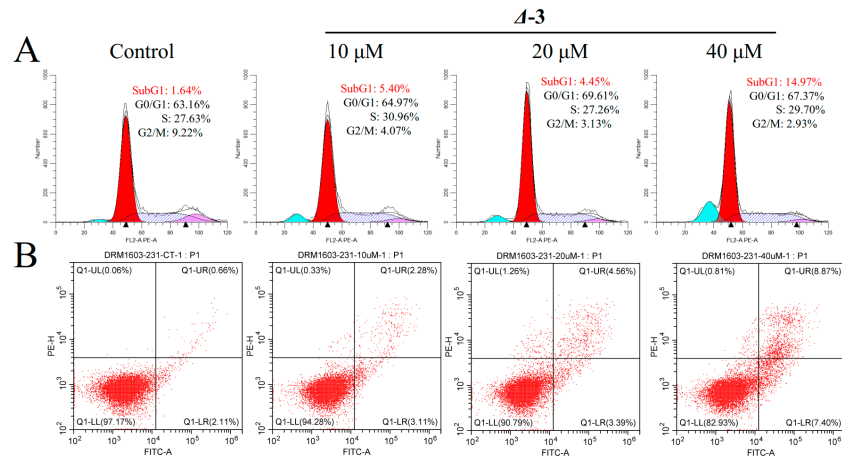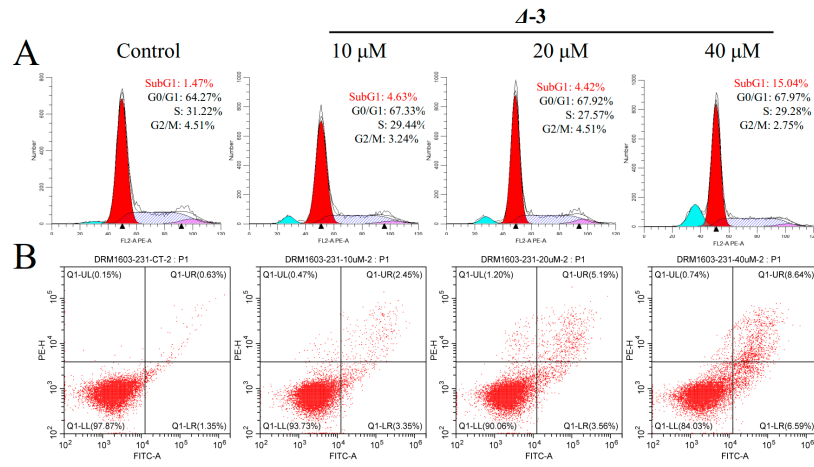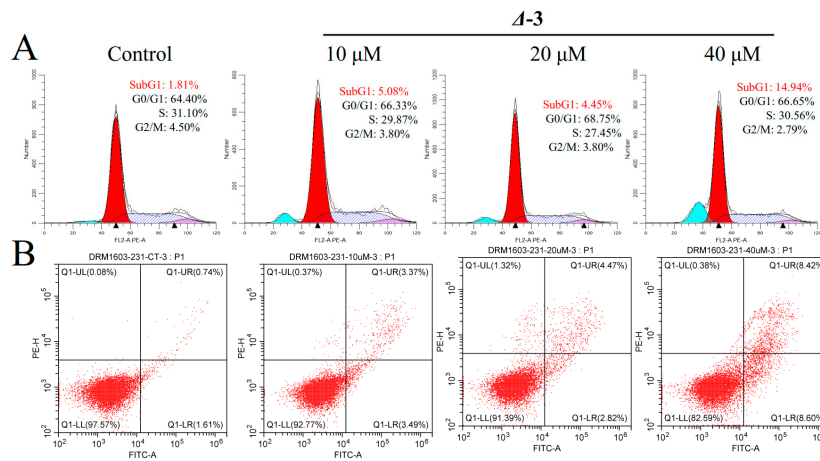

**Figure S23.** Cell cycle distribution (A) and apoptosis (B) of MDA-MB-231 cells incubated with **4-3** (0, 10, 20 and 40 $\mu$ M) for 72 h tested by flow cytometric analysis (three biological repetition).

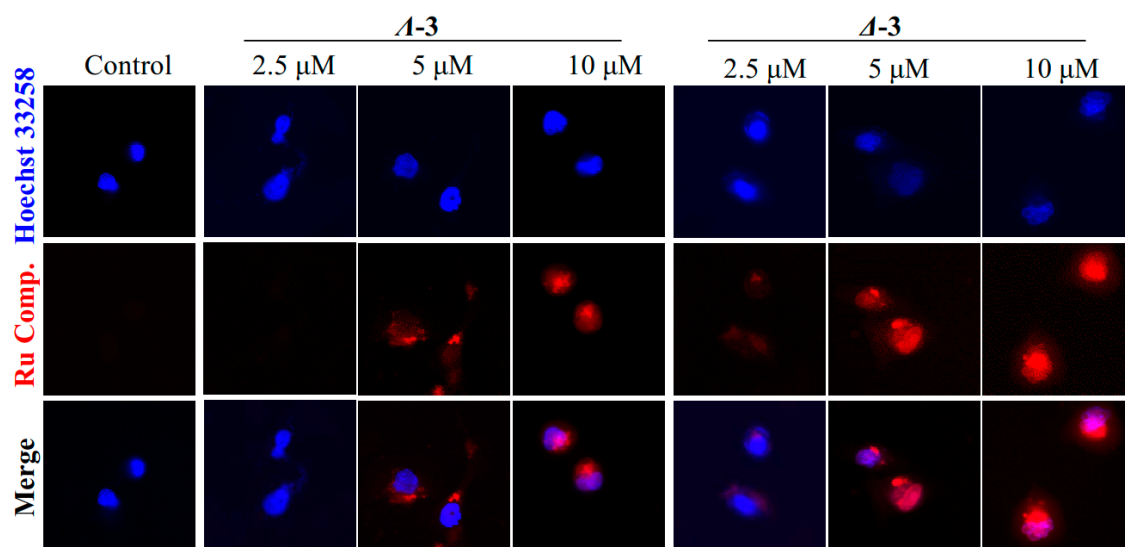

**Figure S24.** The cellular localization of  ***$\Lambda$ -3*** and  ***$\Delta$ -3*** in MDA-MB-231 cells.

MDA-MB-231 cells treated with  ***$\Lambda$ -3*** and  ***$\Delta$ -3*** (2.5, 5 and 10  $\mu$ M) for 24 h. Red:

Ru(II) complex, blue: Hoechst33258.
